# Supplementary material for: Trop2 binding IGF2R induces gefitinib resistance in NSCLC by remodeling the tumor microenvironment
Source: PubMed Central journal article supplement (PMC8317539; doi:10.7150/jca.57711), 2021-07-03
Supplement: jcav12p5310s1.pdf [file jcav12p5310s1.pdf]

**Table S1 The expression levels of Trop2 in NSCLC**

| <b>Characteristic</b>        | <b>n</b> | <b>Trop2 expression</b> |             | <b><i>P</i></b> | <b><math>\chi^2</math></b> |
|------------------------------|----------|-------------------------|-------------|-----------------|----------------------------|
|                              |          | <b>Low or no</b>        | <b>high</b> |                 |                            |
| <b>Cancer tissues</b>        | 164      | 84(51.20)               | 80(48.80)   | 0.526           | 0.066                      |
| <b>Paracancerous tissues</b> | 32       | 16(50.00)               | 16(50.00)   |                 |                            |

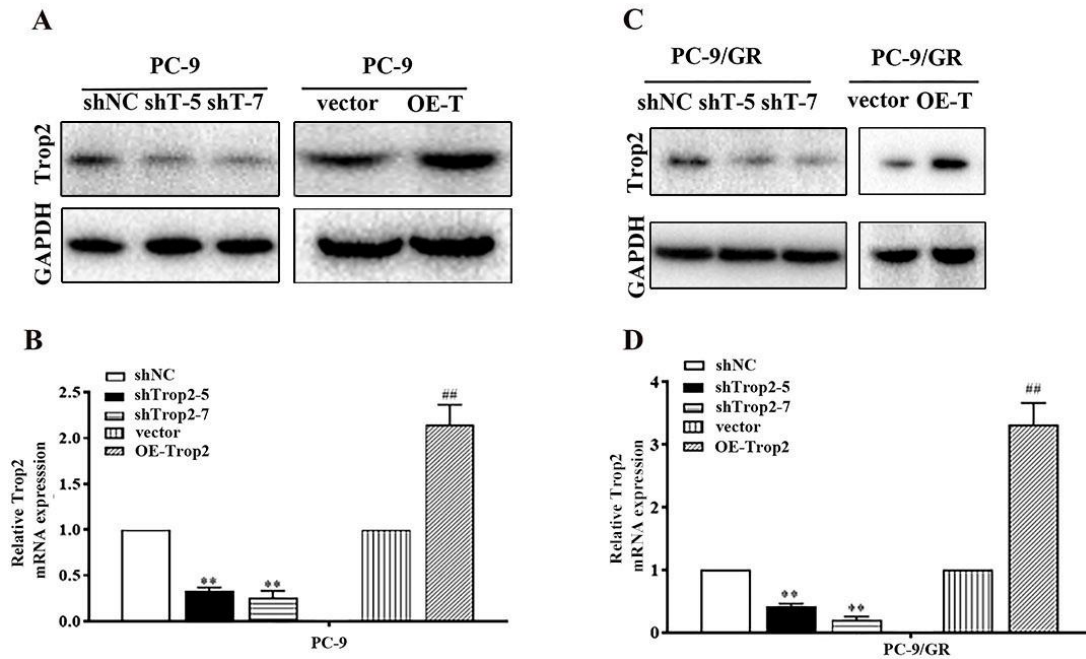

**Figure S1. Knock-down and over-expression of Trop2 in PC-9 and PC-9/GR.**

The efficiency of knock-down and over-expression Trop2 in PC-9 was detected by western blotting (A) and qRT-PCR (B). The efficiency of knock-down and over-expression Trop2 in PC-9/GR was detected by western blotting (C) and qRT-PCR (D). Mean  $\pm$  SD, \*\* $P < 0.01$ , means compared with shNC group; ## $P < 0.001$ , means compared with vector group.
